# Supplementary material for: A combined spin trapping/EPR/mass spectrometry approach to study the formation of a cyclic peroxide by dienolic precursor autoxidation
Source: Royal Society of Chemistry journal article supplement (doi:10.1039/b921694d), 2010-01-01
Supplement: b921694d.pdf [file b921694d.pdf]

Electronic Supplementary Information for

**A combined spin trapping / EPR / mass spectrometry  
approach to study the formation of a cyclic peroxide by  
dienolic precursor autoxidation**

**Mathilde Triquigneaux,<sup>a</sup> Laurence Charles,<sup>a</sup> Christiane André-Barrès<sup>b</sup> and  
Béatrice Tuccio\*<sup>a</sup>**

<sup>a</sup> *Universités Aix-Marseille I, II & III – CNRS, UMR 6264: Laboratoire Chimie  
Provence, Spectrométries Appliquées à la Chimie Structurale,  
13397 Marseille Cedex 20, France .  
Fax: (+33) 491282897; Tel: (+33) 491288743;  
E-mail: beatrice.tuccio-lauricella@univ-provence.fr*

<sup>b</sup> *Université Paul Sabatier – CNRS, UMR 5068: Synthèse et Physico-Chimie de  
Molécules d'Intérêt Biologique, 31062 Toulouse cedex, France*

**Table of contents**

**Figure S1** : ESI-MS/MS spectra of a) [**1a**+H]<sup>+</sup> at 30 eV and b) [**1a**-H]<sup>-</sup> at 30 eV.

**Figure S2** : ESI-MS/MS spectra of a) [**18**+H]<sup>+</sup> at 5 eV and b) [**18**-H]<sup>-</sup> at 5 eV.

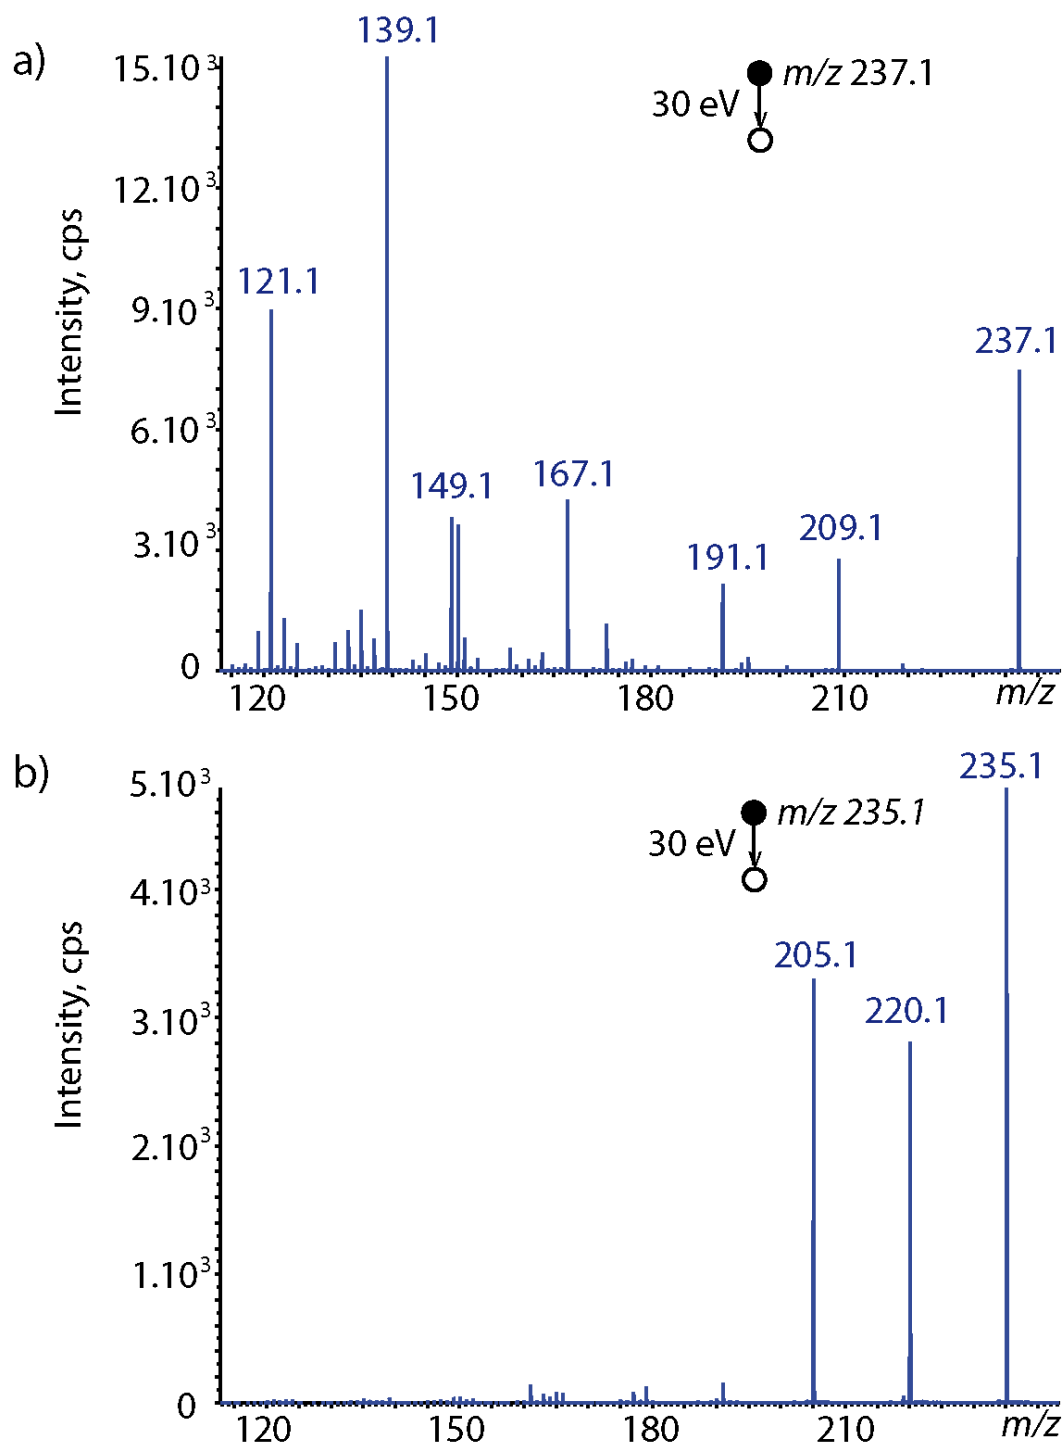

**Figure S1** : ESI-MS/MS spectra of a)  $[1a+H]^+$  at 30 eV and b)  $[1a-H]^-$  at 30 eV.

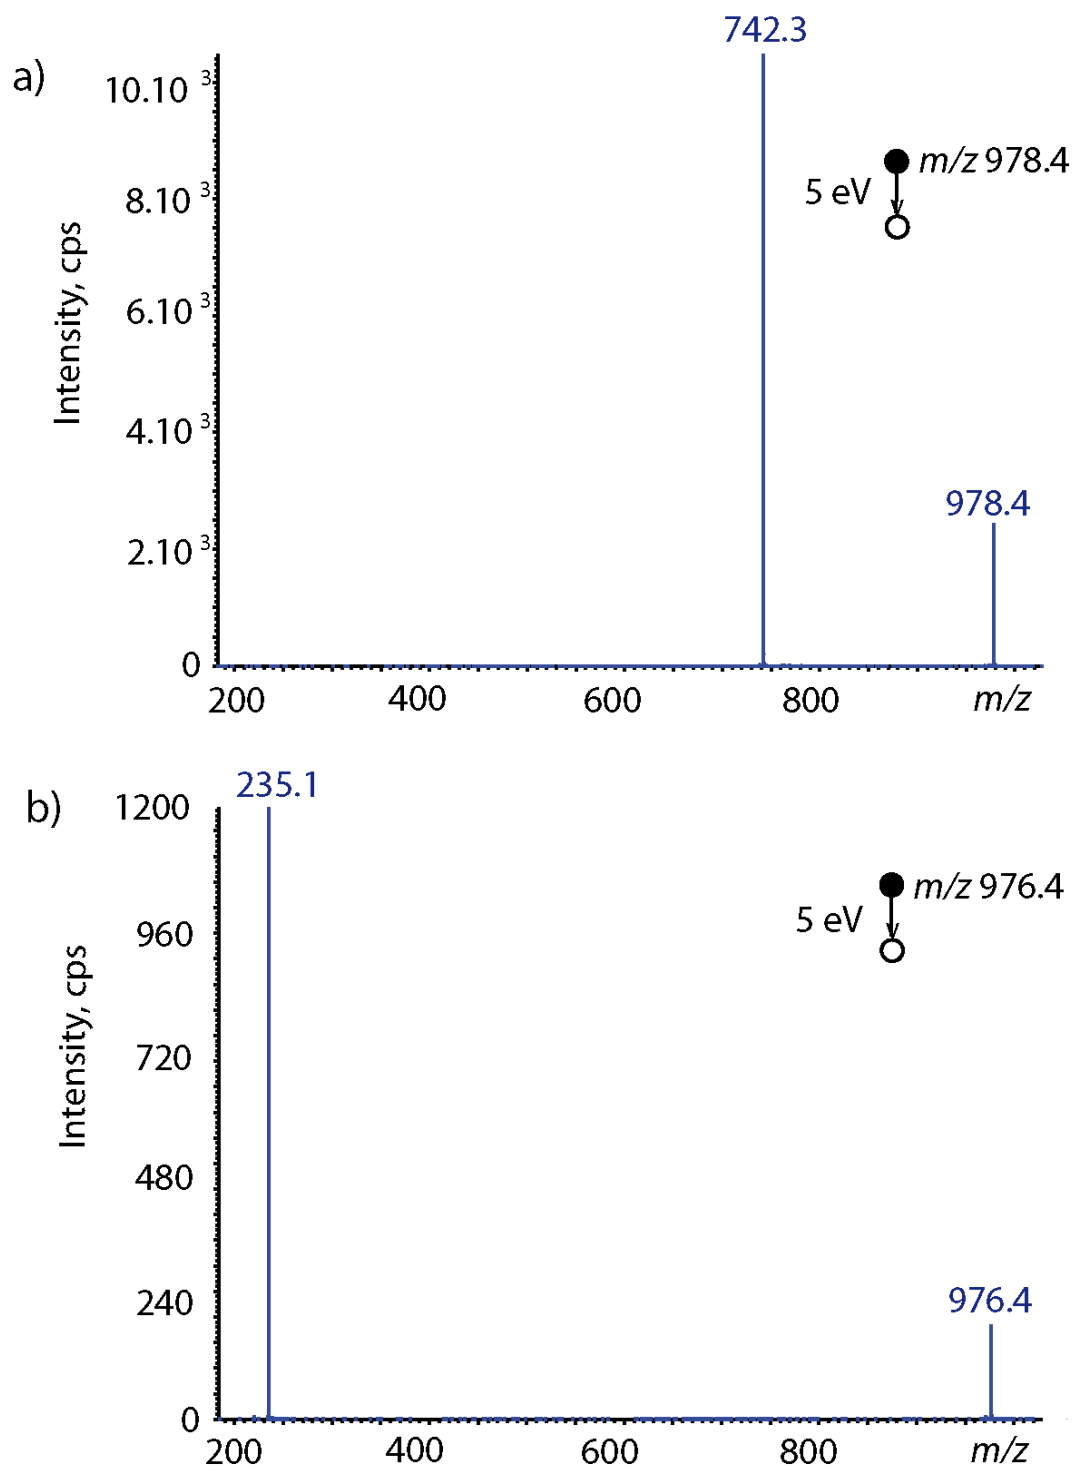

**Figure S2 :** ESI-MS/MS spectra of a) [18+H]<sup>+</sup> at 5 eV and b) [18-H]<sup>-</sup> at 5 eV.
